# Supplementary material for: Detection of N-(1-deoxy-d-fructos-1-yl) Fumonisins B2 and B3 in Corn by High-Resolution LC-Orbitrap MS
Source: Toxins (Basel). 2015 Sep 16;7(9):3700–14. doi: 10.3390/toxins7093700 (PMC4591641; doi:10.3390/toxins7093700)
Supplement: Supplementary file 1 [file toxins-07-03700-s001.pdf]

# Supplementary Materials

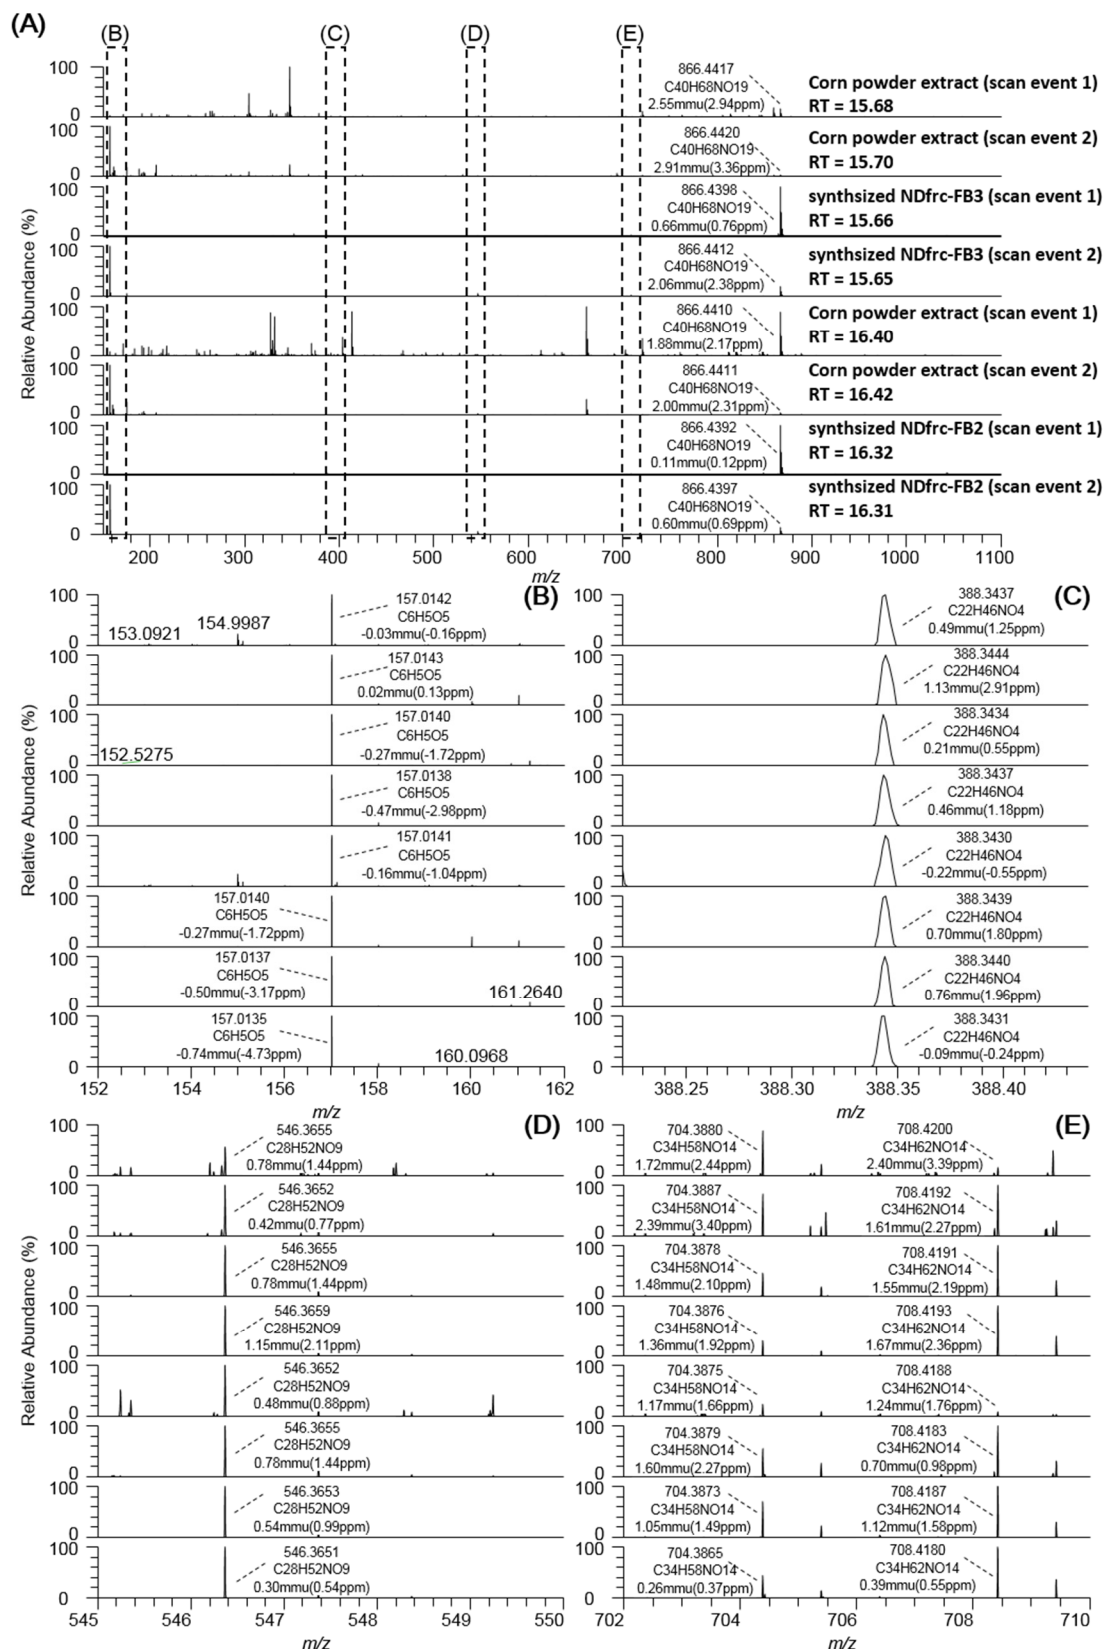

**Figure S1.** Precursor and product ion spectra of NDfrc-FB<sub>2</sub> and NDfrc-FB<sub>3</sub> (in corn powder extract in comparison with those chemically synthesized), and characteristic peak assignment of NDfrc-FB<sub>2</sub> and NDfrc-FB<sub>3</sub>. **(A)** full mass range spectra **(B–E)** magnification of NDfrc-FBs fragments' spectra.

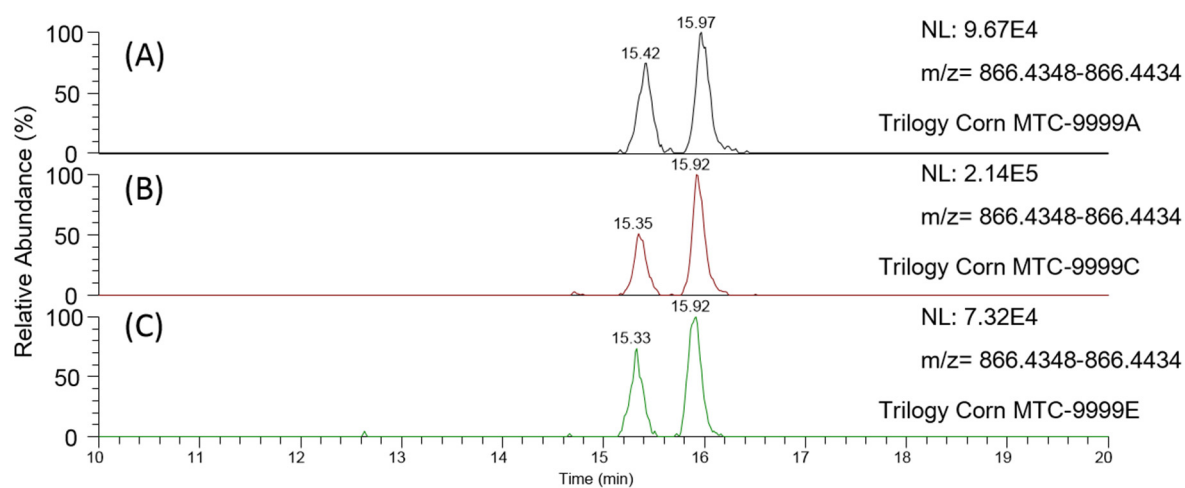

**Figure S2.** Chromatograms of NDfrc-FB<sub>2</sub> (NDfrc-FB<sub>3</sub>) and FB<sub>2</sub> (FB<sub>3</sub>) in Trilogy corn powder extracts (batch number MTC-9999A (A); batch number MTC-9999C (B) and batch number MTC-9999E (C)).
